# Supplementary material for: Prior Knowledge, Older Age, and Higher Allowance Are Risk Factors for Self-Medication with Antibiotics among University Students in Southern China
Source: PLOS journal article supplement (doi:10.1371/journal.pone.0041314), 2012-07-20
Supplement: S2 (10.1371/journal.pone.0041314.s002) [file journal.pone.0041314.s002]

# File S1: Questionnaire for self-medication with antibiotics

## Part A: Self-medication behaviors

|   |                                                                                                                                                                                                                                                                                                                                                              |
|---|--------------------------------------------------------------------------------------------------------------------------------------------------------------------------------------------------------------------------------------------------------------------------------------------------------------------------------------------------------------|
| 1 | <p><b>Have you ever taken antibiotics?</b></p> <p>A. Yes</p> <p>B. No</p> <p><i>If NO, please go to Part B Question 1</i></p>                                                                                                                                                                                                                                |
| 2 | <p><b>Have you ever treated yourself (self-medicated) with antibiotics?</b></p> <p>A. Yes</p> <p>B. No</p> <p><i>If NO, please go to Part B Question 1</i></p>                                                                                                                                                                                               |
| 3 | <p><b>How many times did you treat yourself with antibiotics in the past one year?</b></p> <p>_____</p>                                                                                                                                                                                                                                                      |
| 4 | <p><b>What was (were) your reason(s) of self-medication with antibiotics? (check more than one if applicable)</b></p> <p>A. Cost saving</p> <p>B. Convenience</p> <p>C. Lack of trust in prescribing doctor</p> <p>D. Others (specify) _____</p>                                                                                                             |
| 5 | <p><b>For which of the following complaint(s) did you use antibiotics? (check more than one if applicable)</b></p> <p>A. Runny nose</p> <p>B. Nasal congestion</p> <p>C. Cough</p> <p>D. Sore throat</p> <p>E. Fever</p> <p>F. Aches and pains</p> <p>G. Vomiting</p> <p>H. Diarrhea</p> <p>I. Skin wounds</p> <p>J. Others (specify) _____</p>              |
| 6 | <p><b>Your selection of antibiotics was based on... (check more than one if applicable)</b></p> <p>A. Recommendation by community pharmacists</p> <p>B. Opinion of family members</p> <p>C. Opinion of friends</p> <p>D. My own experience</p> <p>E. Recommendation by net citizens</p> <p>F. Previous doctor's prescription</p> <p>G. The advertisement</p> |
| 7 | <p><b>What did you consider when selecting antibiotics? (check more than one if applicable)</b></p> <p>A. Type of antibiotics</p> <p>B. Brand of antibiotics</p> <p>C. Price of antibiotics</p> <p>D. Indications for use</p> <p>E. Adverse reactions</p> <p>F. Others (specify) _____</p>                                                                   |
| 8 | <p><b>Where did you usually obtain antibiotics from for self-medication? (check more than one if applicable)</b></p> <p>A. Community pharmacies</p> <p>B. TCM practitioners</p>                                                                                                                                                                              |

|    |                                                                                                                                                                                                                                                                                                                                                                                                                                          |
|----|------------------------------------------------------------------------------------------------------------------------------------------------------------------------------------------------------------------------------------------------------------------------------------------------------------------------------------------------------------------------------------------------------------------------------------------|
|    | <p>C. Leftover from previous prescription</p> <p>D. Online shopping/E-pharmacies</p> <p>E. Others (specify) _____</p>                                                                                                                                                                                                                                                                                                                    |
| 9  | <p><b>Did you ever check the instructions come with the package insert of antibiotics for self-treatment?</b></p> <p>A. Yes, always</p> <p>B. Yes, sometimes</p> <p>C. Never</p> <p><i>If <b>Never</b>, please go to Question 11</i></p>                                                                                                                                                                                                 |
| 10 | <p><b>How much did you understand the instructions?</b></p> <p>A. Fully understood</p> <p>B. Partly understood (percentage: _____)</p> <p>C. Did not understand at all</p>                                                                                                                                                                                                                                                               |
| 11 | <p><b>How did you know the dosage of antibiotics? (check more than one if applicable)</b></p> <p>A. By checking the package insert</p> <p>B. By consulting a doctor</p> <p>C. By consulting a pharmacist</p> <p>D. By consulting family members/friends</p> <p>E. From the newspapers, magazines, books, or TV programs</p> <p>F. From the Internet</p> <p>G. From my previous experience</p> <p>H. By guessing the dosage by myself</p> |
| 12 | <p><b>Did you ever change the dosage of antibiotics deliberately during the course of self-treatment?</b></p> <p>A. Yes, always</p> <p>B. Yes, sometimes</p> <p>C. Never</p> <p><i>If <b>Never</b>, please go to Question 14</i></p>                                                                                                                                                                                                     |
| 13 | <p><b>Why did you change the dosage of antibiotics during the course of self-treatment? (check more than one if applicable)</b></p> <p>A. Improving conditions</p> <p>B. Worsening conditions</p> <p>C. To reduce adverse reactions</p> <p>D. Drug insufficient for complete treatment</p> <p>E. Others (specify) _____</p>                                                                                                              |
| 14 | <p><b>Did you ever switch antibiotics during the course of self-treatment?</b></p> <p>A. Yes, always</p> <p>B. Yes, sometimes</p> <p>C. Never</p> <p><i>If <b>Never</b>, please go to Question 16</i></p>                                                                                                                                                                                                                                |
| 15 | <p><b>Why did you switch antibiotics during the course of self-treatment? (check more than one if applicable)</b></p> <p>A. The former antibiotics did not work</p> <p>B. The former antibiotics ran out</p> <p>C. The latter one was cheaper</p> <p>D. To reduce adverse reactions</p> <p>E. Others (specify) _____</p>                                                                                                                 |
| 16 | <p><b>How many different antibiotics did you take maximally during a single illness?</b></p> <p>_____</p>                                                                                                                                                                                                                                                                                                                                |
| 17 | <p><b>Are you concerned that you might have taken counterfeit antibiotics?</b></p> <p>A. Yes, very much</p> <p>B. Yes, somewhat</p>                                                                                                                                                                                                                                                                                                      |

|    |                                                                                                                                                                                                                                                                                                                                                               |
|----|---------------------------------------------------------------------------------------------------------------------------------------------------------------------------------------------------------------------------------------------------------------------------------------------------------------------------------------------------------------|
|    | C. No                                                                                                                                                                                                                                                                                                                                                         |
| 18 | <b>Have you ever found out that you had taken the same antibiotics with different names at the same time?</b><br>A. Yes<br>B. No                                                                                                                                                                                                                              |
| 19 | <b>When did you normally stop taking antibiotics? (check more than one if applicable)</b><br>A. After a few days regardless of the outcome<br>B. After symptoms disappeared<br>C. A few days after the recovery<br>D. After antibiotics ran out<br>E. At the completion of the course<br>F. After consulting a doctor/pharmacist<br>G. Others (specify) _____ |
| 20 | <b>Have you ever had any adverse reaction when you took antibiotics for self-medication?</b><br>A. Yes (specify) _____<br>B. No<br><i>If NO, please go to Question 22</i>                                                                                                                                                                                     |
| 21 | <b>What did you do for the adverse reactions? (check more than one if applicable)</b><br>A. Stopped taking antibiotics<br>B. Switched to another antibiotic<br>C. Consulted pharmacy staff<br>D. Consulted a doctor<br>E. Consulted family members/friends<br>F. Nothing<br>G. Others (specify) _____                                                         |
| 22 | <b>Please write down the names of antibiotics you have ever taken for SELF-MEDICATION:</b><br>A. _____ B. _____ C. _____<br>D. _____ E. _____                                                                                                                                                                                                                 |
| 23 | <b>What do you think about self-medication with antibiotics for self health care?</b><br>A. Good practice<br>B. Acceptable practice<br>C. Not acceptable practice                                                                                                                                                                                             |
| 24 | <b>Do you think you can treat common infectious diseases with antibiotics successfully by yourself?</b><br>A. Yes, I can<br>B. Not sure<br>C. No, I cannot                                                                                                                                                                                                    |

## Part B: Knowledge

|   |                                                                                                                                                                                                                |
|---|----------------------------------------------------------------------------------------------------------------------------------------------------------------------------------------------------------------|
| 1 | <b>Do you know what are antibiotics?</b><br>A. Yes<br>B. No                                                                                                                                                    |
| 2 | <b>What are antibiotics used for? (check more than one if applicable)</b><br>A. Virus infection<br>B. Bacterial infection<br>C. Others (specify) _____                                                         |
| 3 | <b>Which of the following statement(s) about antibiotics is (are) correct? (True/False)</b><br>A. Broad-spectrum antibiotics are better than narrow-spectrum ones<br>B. Higher doses result in faster recovery |

|   |                                                                                                                                                                                                                                         |
|---|-----------------------------------------------------------------------------------------------------------------------------------------------------------------------------------------------------------------------------------------|
|   | <p>C. Lower doses result in less adverse reactions</p> <p>D. Switching antibiotics enhances drug effects</p> <p>E. Switching antibiotics reduces adverse reactions</p> <p>F. Intravenous is better than oral medication</p>             |
| 4 | <p><b>What is (are) the common adverse reaction(s) of antibiotics? (check more than one if applicable)</b></p> <p>A. Nausea</p> <p>B. Vomiting</p> <p>C. Diarrhea</p> <p>D. Rash</p> <p>E. Vaginal thrush</p> <p>F. Drug resistance</p> |

## Background

|                                                                                                                                                                                                                                                                                                  |                                     |
|--------------------------------------------------------------------------------------------------------------------------------------------------------------------------------------------------------------------------------------------------------------------------------------------------|-------------------------------------|
| <b>Age (years):</b> _____                                                                                                                                                                                                                                                                        | <b>Gender:</b> A. Male    B. Female |
| <b>School/college:</b>                                                                                                                                                                                                                                                                           |                                     |
| <p>A. College of Science</p> <p>B. Medical College</p> <p>C. College of Liberal Arts</p> <p>D. College of Engineering</p> <p>E. Law School</p> <p>F. Business School</p> <p>G. Cheung Kong School of Art and Design</p> <p>H. Cheung Kong School of Journalism and Communication</p>             |                                     |
| <b>Program:</b>                                                                                                                                                                                                                                                                                  |                                     |
| <p>A. Undergraduate</p> <p>B. Masters</p> <p>C. Ph.D.</p>                                                                                                                                                                                                                                        |                                     |
| <b>Year of your study: (e.g., 2<sup>nd</sup> year)</b>                                                                                                                                                                                                                                           |                                     |
| _____                                                                                                                                                                                                                                                                                            |                                     |
| <b>Your monthly allowance:</b>                                                                                                                                                                                                                                                                   |                                     |
| <p>A. ≤500 RMB</p> <p>B. 500 to 1,000 RMB</p> <p>C. 1,001 to 2,000 RMB</p> <p>D. &gt;2,000 RMB</p>                                                                                                                                                                                               |                                     |
| <b>What kind(s) of health insurance(s) do you have this year? (check more than one if applicable)</b>                                                                                                                                                                                            |                                     |
| <p>A. Free medical care</p> <p>B. College insurance</p> <p>C. Basic medical insurance for town staff</p> <p>D. Medical insurance for urban and town residents</p> <p>E. Commercial health insurance</p> <p>F. New rural co-operative medical insurance</p> <p>G. None</p> <p>H. Others _____</p> |                                     |
| <b>Hometown:</b> _____ Province _____ City                                                                                                                                                                                                                                                       |                                     |

\*\*\* The end \*\*\*
